# Supplementary material for: PreLect: Prevalence leveraged consistent feature selection decodes microbial signatures across cohorts
Source: PubMed Central journal article supplement — NPJ Biofilms Microbiomes. 2025 Jan 3;11:3. doi: 10.1038/s41522-024-00598-2 (PMC11698977; doi:10.1038/s41522-024-00598-2), 2025-01-03
Supplement: 41522_2024_598_MOESM1_ESM.pdf [file 41522_2024_598_MOESM1_ESM.pdf]

1 **Supporting Information**

2 **PreLect: Prevalence Leveraged Consistent Feature Selection Decodes Microbial**  
3 **Signatures across Cohorts**

4 Yin-Cheng Chen, Yin-Yuan Su, Tzu-Yu Chu, Ming-Fong Wu, Chieh-Chun Huang,  
5 Chen-Ching Lin

6

7 **SI Figures ..... 3**

8 **Supplementary Figure 1. The feature prevalence profile among statistics-based methods in the**  
9 **Zeller\_CRC dataset..... 3**

10 **Supplementary Figure 2. The feature prevalence profile among ML-based methods in the**  
11 **Zeller\_CRC dataset..... 4**

12 **Supplementary Figure 3. Feature prevalence profile in the sw\_sed\_detender dataset using statistics-**  
13 **based methods..... 5**

14 **Supplementary Figure 4. The feature prevalence profile among ML-based methods in the**  
15 **sw\_sed\_detender dataset..... 6**

16 **Supplementary Figure 5. Comparison of PreLect with the full feature set of ML-base methods. .... 7**

17 **Supplementary Figure 6. Synthetic data strategy and results..... 8**

18 **Supplementary Figure 7. Universality of prevalent features across cohorts. .... 9**

19 **Supplementary Figure 8. Enriched KO in FoxO signaling pathway..... 10**

20 **Supplementary Figure 9. Comparison of PreLect with other ML-based methods in shotgun dataset.**  
21 **..... 11**

22 **Supplementary Figure 10. The sparsity of miRNA dataset..... 12**

23 **Supplementary Figure 11. Comparison of PreLect with other ML-based methods in microRNA**  
24 **dataset..... 13**

25 **Supplementary Figure 12. Exploring the potential of PreLect for multi-class classification. .... 14**

26 **Supplementary Figure 13. PreLect regression applied to obesity 16S amplicon data. .... 15**

27 **Supplementary Figure 14. Comparative analysis of PreLect and conventional feature selection**  
28 **methods using prevalence filtering strategy across 42 microbiome datasets..... 16**

29 **Supplementary Figure 15. Classification capability of prevalent features..... 17**

|    |                                                                                                       |    |
|----|-------------------------------------------------------------------------------------------------------|----|
| 30 | <b>Supplementary Figure 16. The prevalence distribution of the features could influence PreLect's</b> |    |
| 31 | <b>performance.</b> .....                                                                             | 18 |
| 32 | <b>Supplementary Figure 17. Stability of PreLect with VST-transformed data and z-Score</b>            |    |
| 33 | <b>standardization.</b> .....                                                                         | 19 |
| 34 | <b>Supplementary Figure 18. PreLect application in real-sim dataset.</b> .....                        | 20 |
| 35 | <b>Supplementary Notes</b> .....                                                                      | 21 |
| 36 | <b>Supplementary Note 1: Multi-class classification</b> .....                                         | 21 |
| 37 | <b>Supplementary Note 2: PreLect regression</b> .....                                                 | 21 |
| 38 | <b>Supplementary Note 3: Benchmarked methods</b> .....                                                | 21 |
| 39 | <b>References</b> .....                                                                               | 24 |
| 40 |                                                                                                       |    |
| 41 |                                                                                                       |    |

## 42 SI Figures

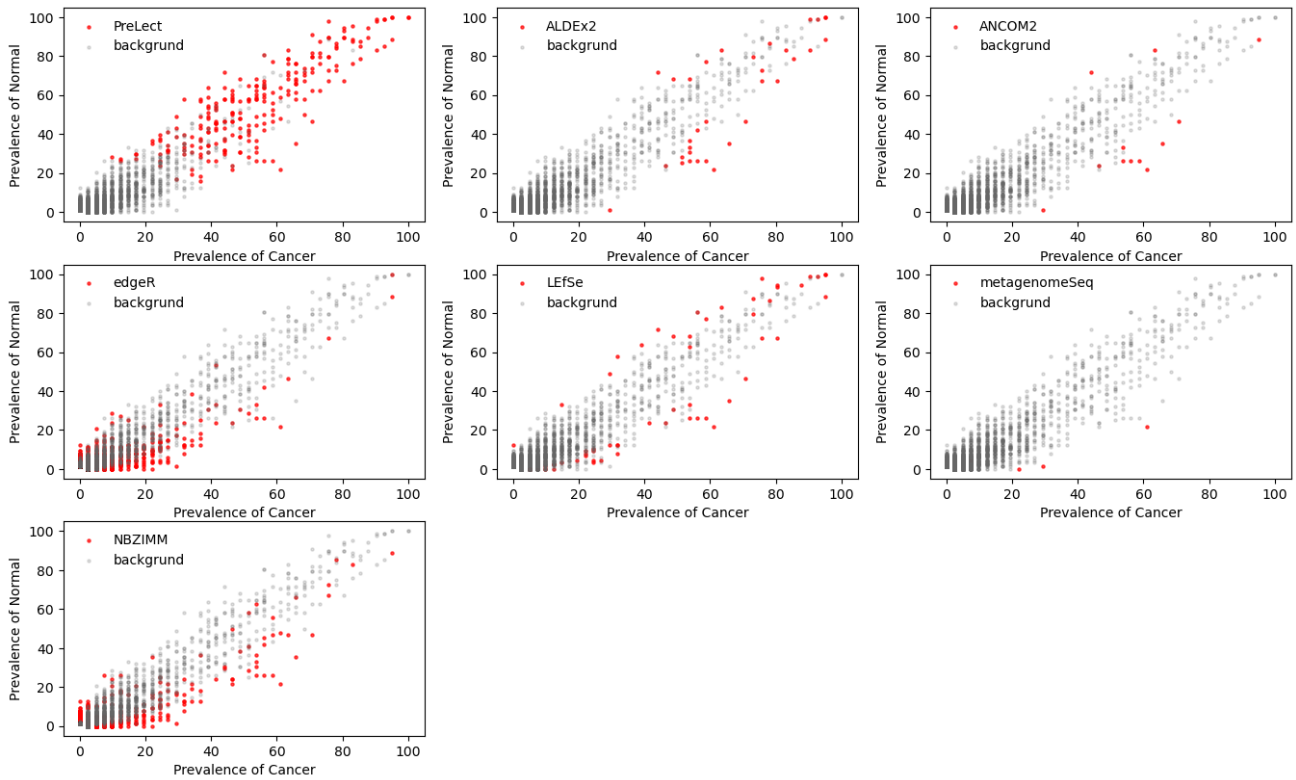

44 **Supplementary Figure 1. The feature prevalence profile among statistics-based methods in the**  
45 **Zeller\_CRC dataset.**

46 The selected features with each method were highlighted as red dots. The x-axis represents the feature  
47 prevalence in the CRC patients, and the y-axis indicates the feature prevalence in control.

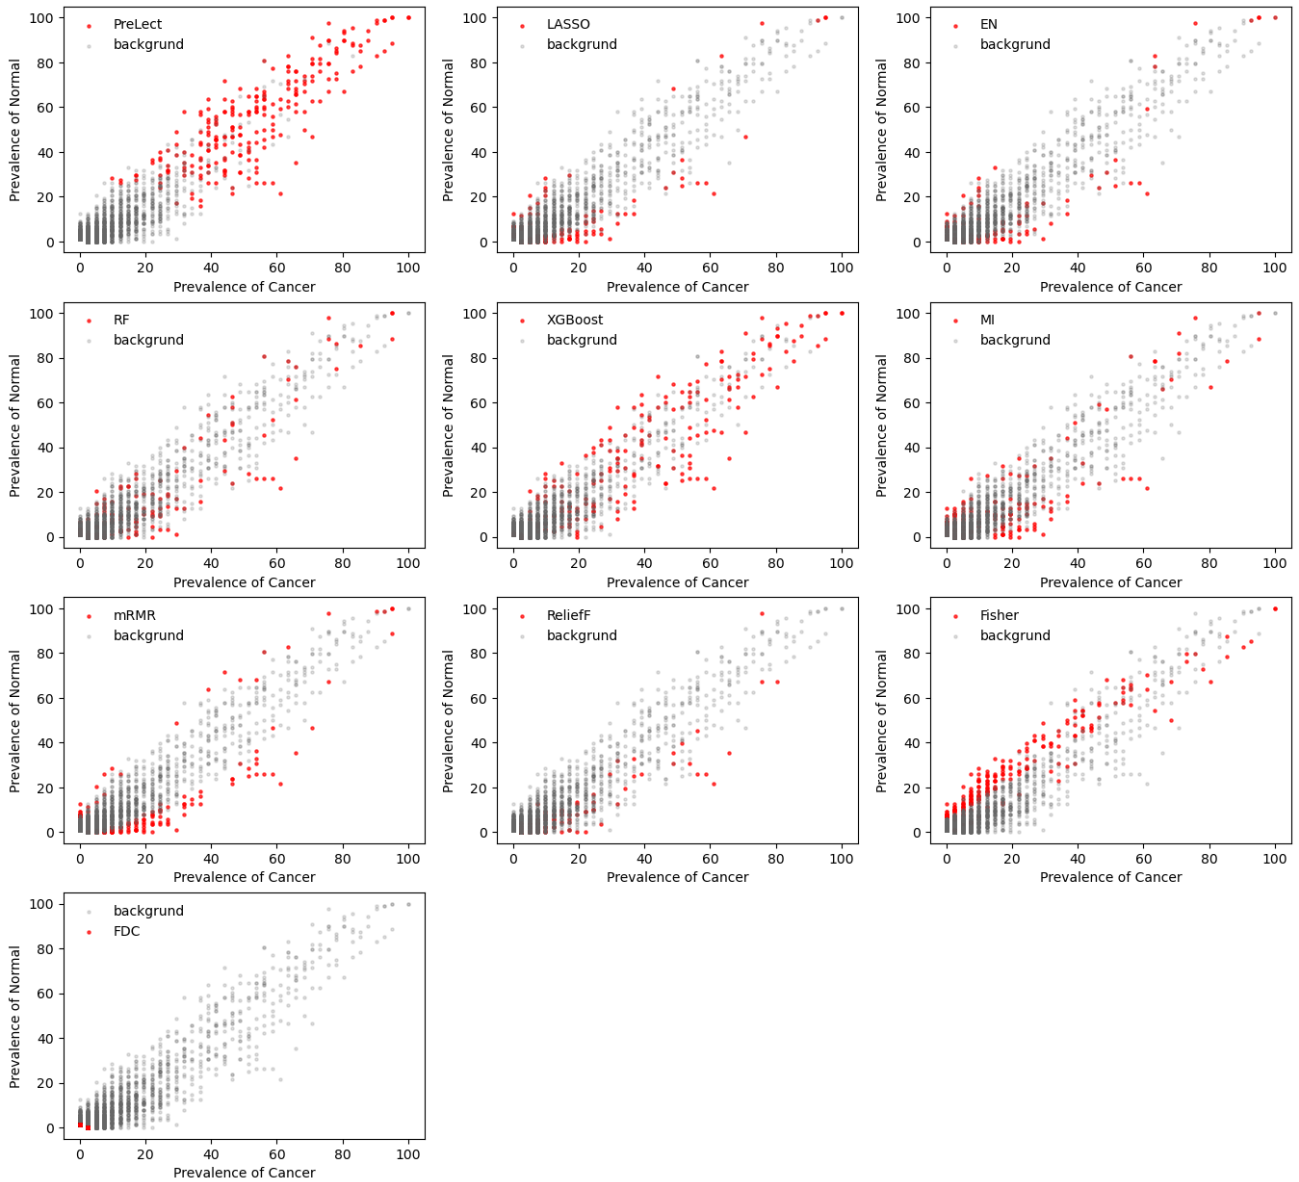

48

49 **Supplementary Figure 2. The feature prevalence profile among ML-based methods in the**  
 50 **Zeller\_CRC dataset.**

51 The selected features with each method were highlighted as red dots. The x-axis represents the feature  
 52 prevalence in CRC patients, and the y-axis indicates the prevalence in control.

53

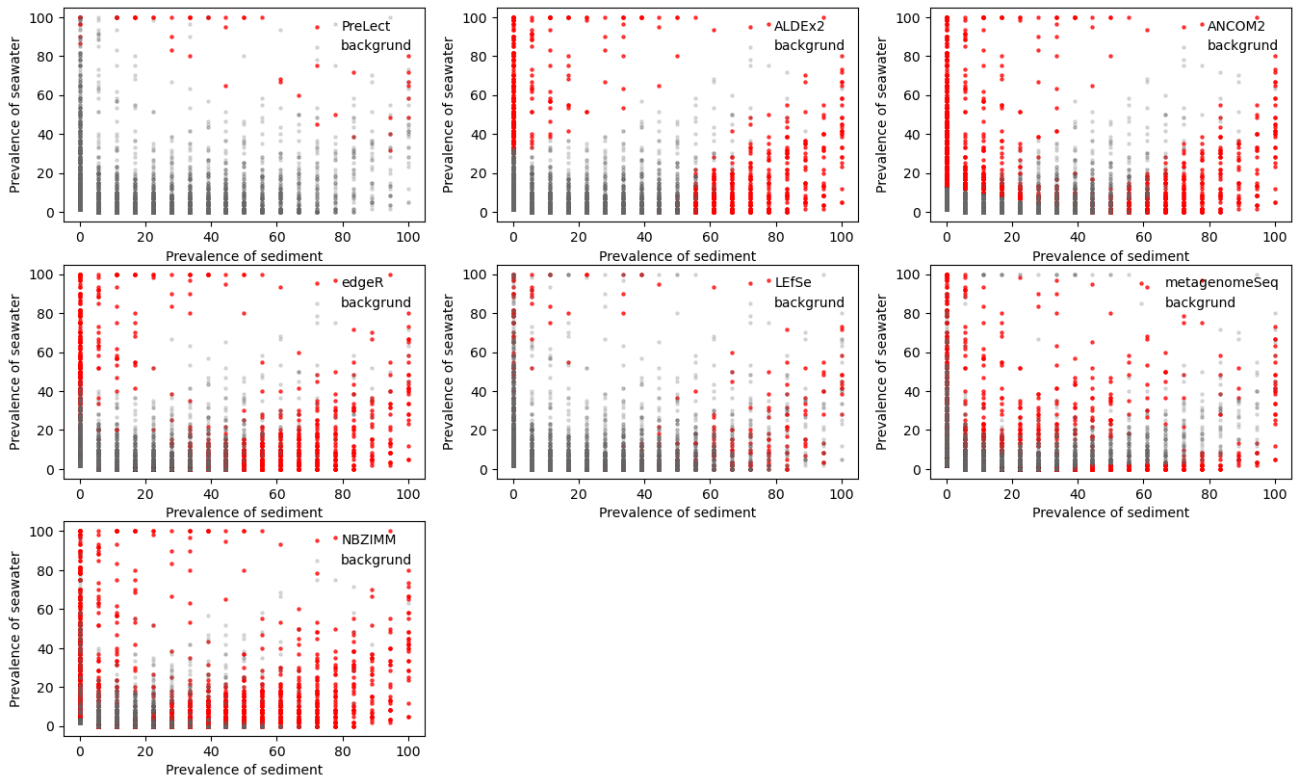

54

55 **Supplementary Figure 3. Feature prevalence profile in the sw\_sed\_detender dataset using**  
 56 **statistics-based methods.**

57 This figure highlights the selected features as red dots. The y-axis represents feature prevalence in  
 58 sediment, while the x-axis indicates feature prevalence in seawater. This visualization helps to compare  
 59 the prevalence of features selected by different methods across the two environmental conditions.

60

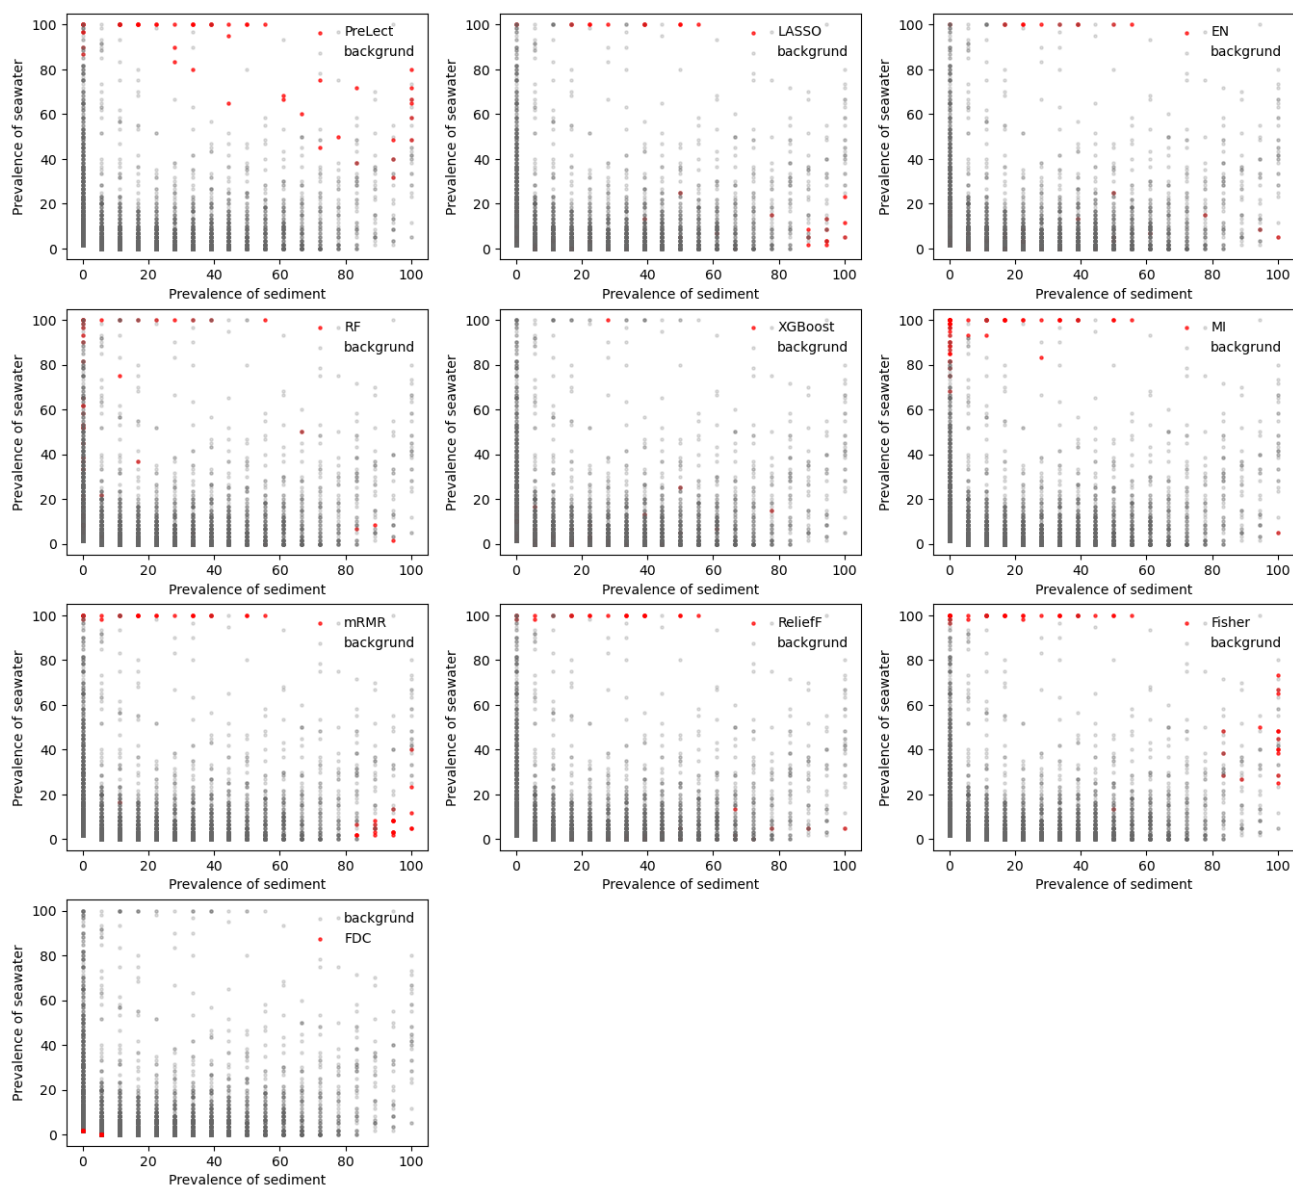

62

63 **Supplementary Figure 4. The feature prevalence profile among ML-based methods in the**  
 64 **sw\_sed\_detender dataset.**

65 The selected features with each method were highlighted as red dots. The x-axis represents the feature  
 66 prevalence in the sediment, and the y-axis indicates the feature prevalence in seawater.

67

68

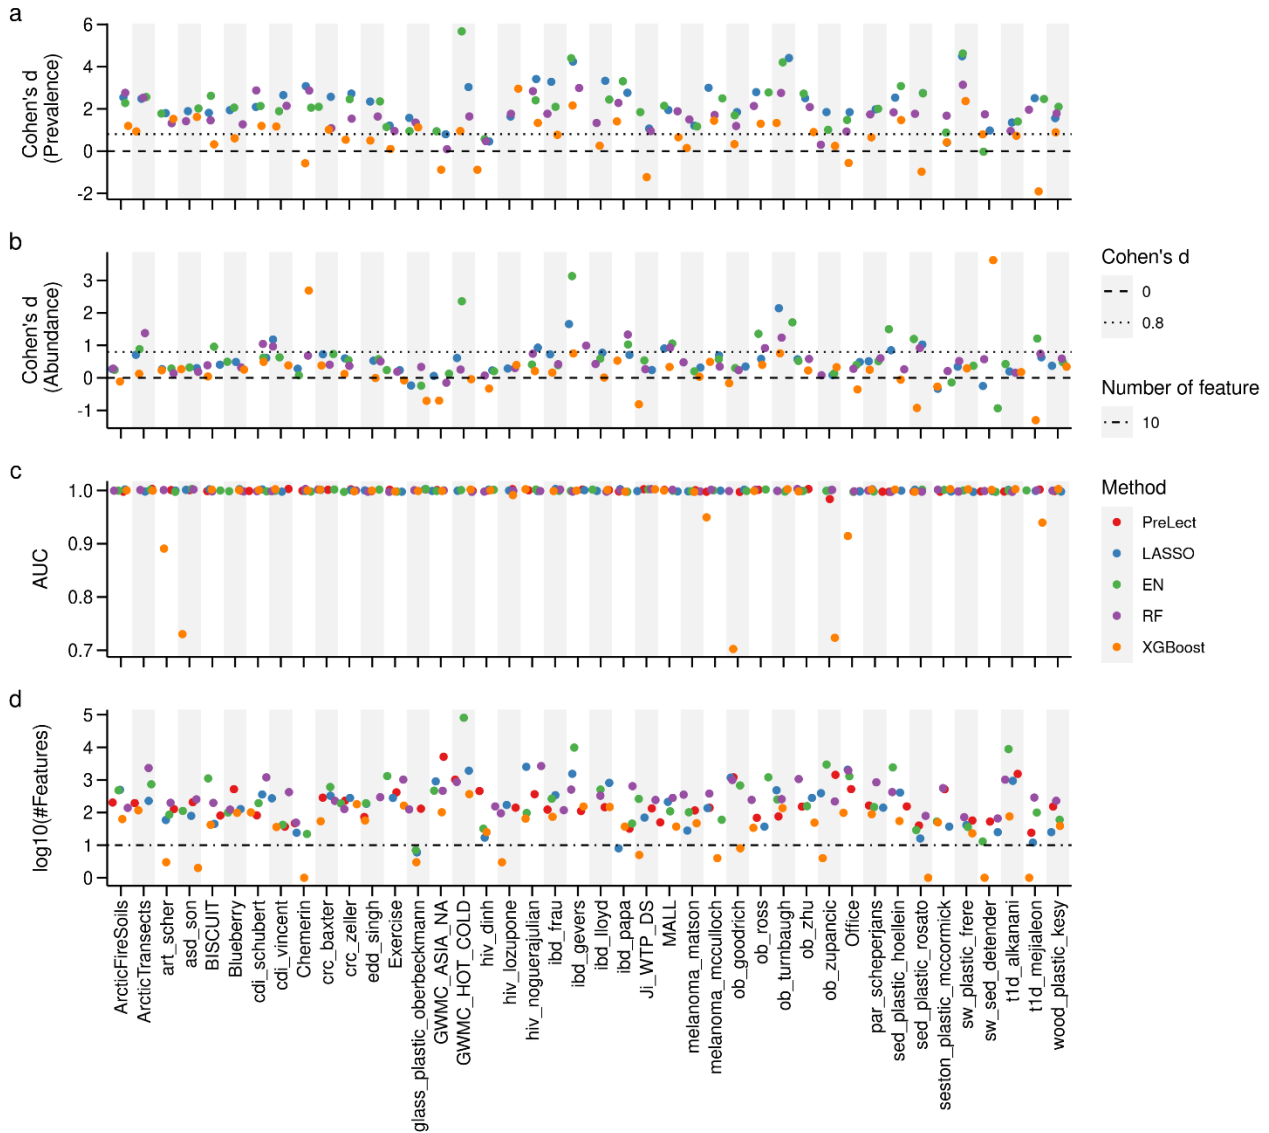

69

70 **Supplementary Figure 5. Comparison of PreLect with the full feature set of ML-base methods.**

71 (A) and (B) Effect size of prevalence and abundance difference. Cohen's D measures the effect size  
 72 difference between PreLect and other benchmarked machine learning methods. Values above 0.8  
 73 (dotted line) indicate a notable higher feature prevalence of PreLect. (C) Classification performance.  
 74 The area under the receiver operating characteristic curve (AUC) is derived from a naïve logistic  
 75 regression model to classify case and control samples. Herein, all the ML-based methods use the  
 76 default number of features, and (D) shows the number of features used in each method.

77

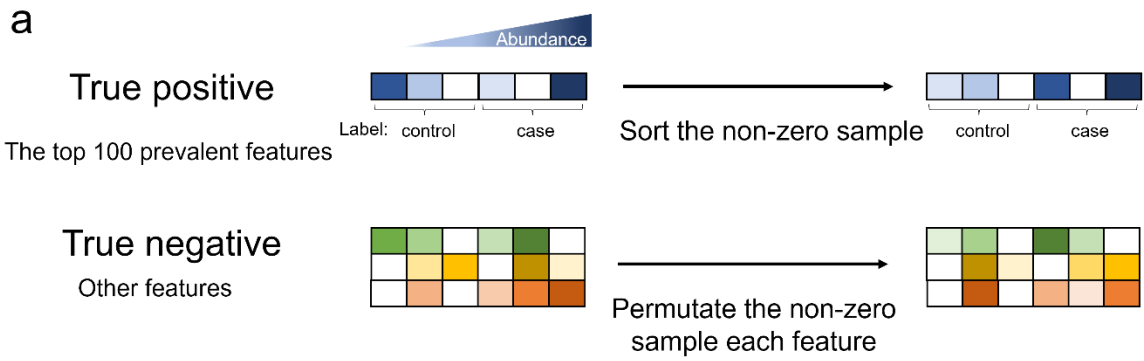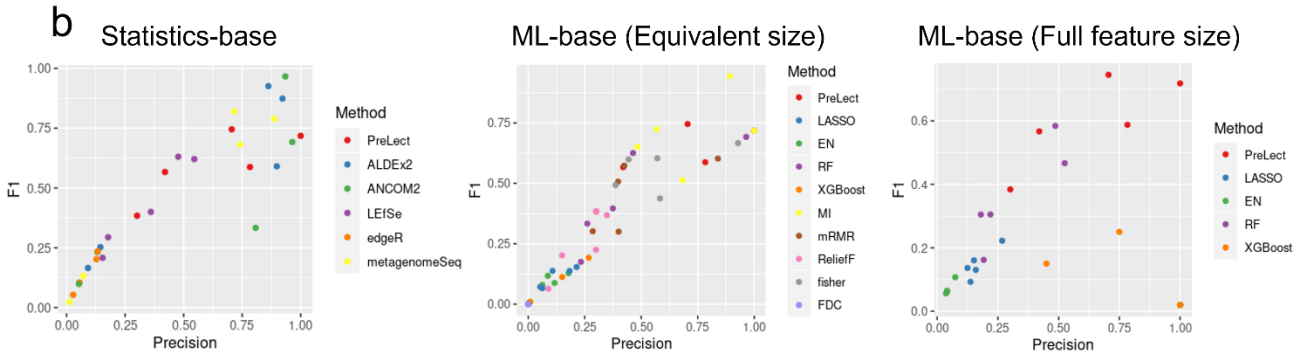

78

79 **Supplementary Figure 6. Synthetic data strategy and results.**

80 (A) This panel illustrates the synthetic data strategy used to generate true positive and true negative  
 81 features, ensuring a controlled environment to assess feature selection methods accurately. (B) This  
 82 panel displays the precision and F1 scores for each benchmarking method, providing a quantitative  
 83 comparison of their performance in identifying true positive features within the synthetic datasets.

84



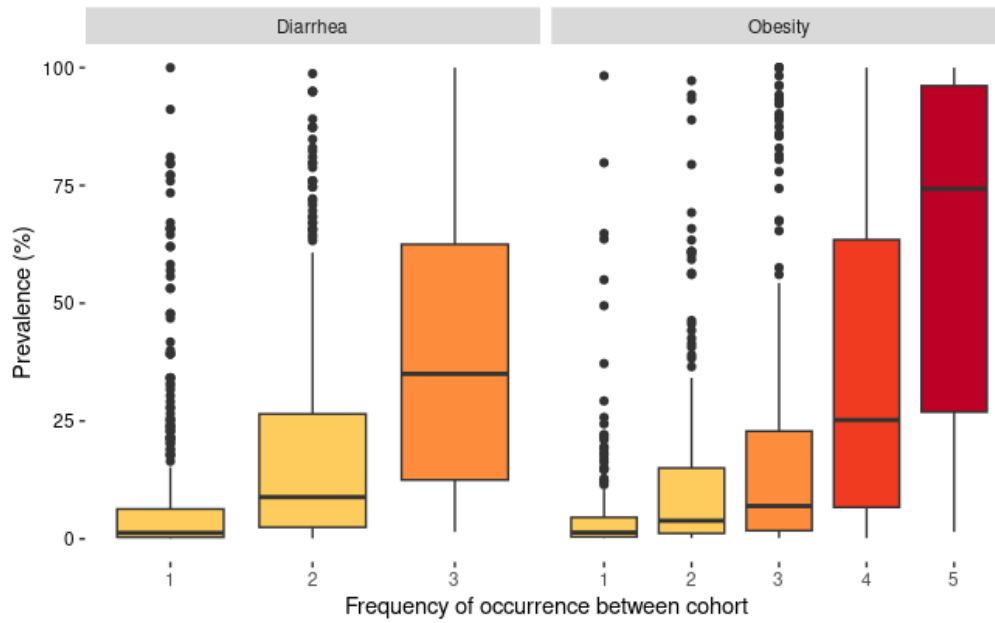

85

86 **Supplementary Figure 7. Universality of prevalent features across cohorts.**

87 The frequency of features is calculated based on their occurrence across different cohorts and is  
 88 compared with their prevalence within each individual dataset. This approach highlights the  
 89 relationship between multi-cohort occurrence and dataset-specific prevalence.

90

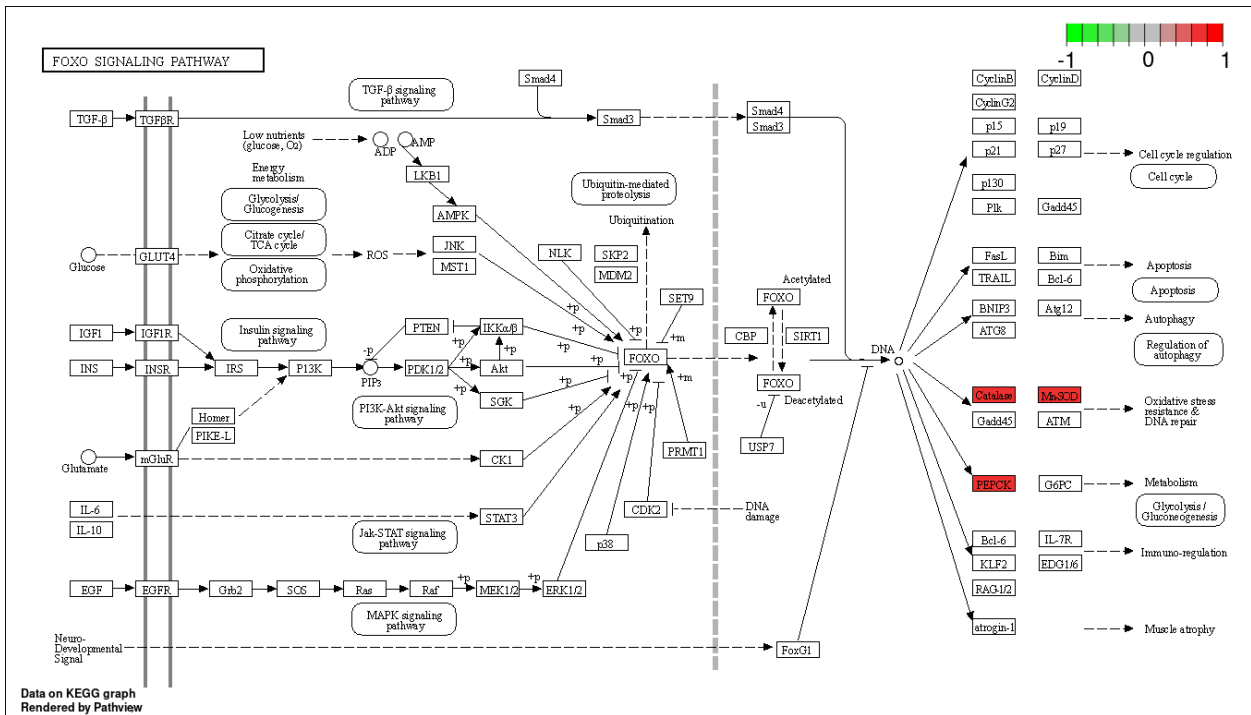

91  
92 **Supplementary Figure 8. Enriched KO in FoxO signaling pathway.**

93 The catalase (K03781) and superoxide dismutase (K04564) were found to be significantly enriched in  
94 colorectal cancer (CRC) based on GSEA and are highlighted. A color scheme is used to depict the fold-  
95 changes of these KOs: red signifies KOs enriched in cancer patients, and green indicates KOs enriched  
96 in normal samples.

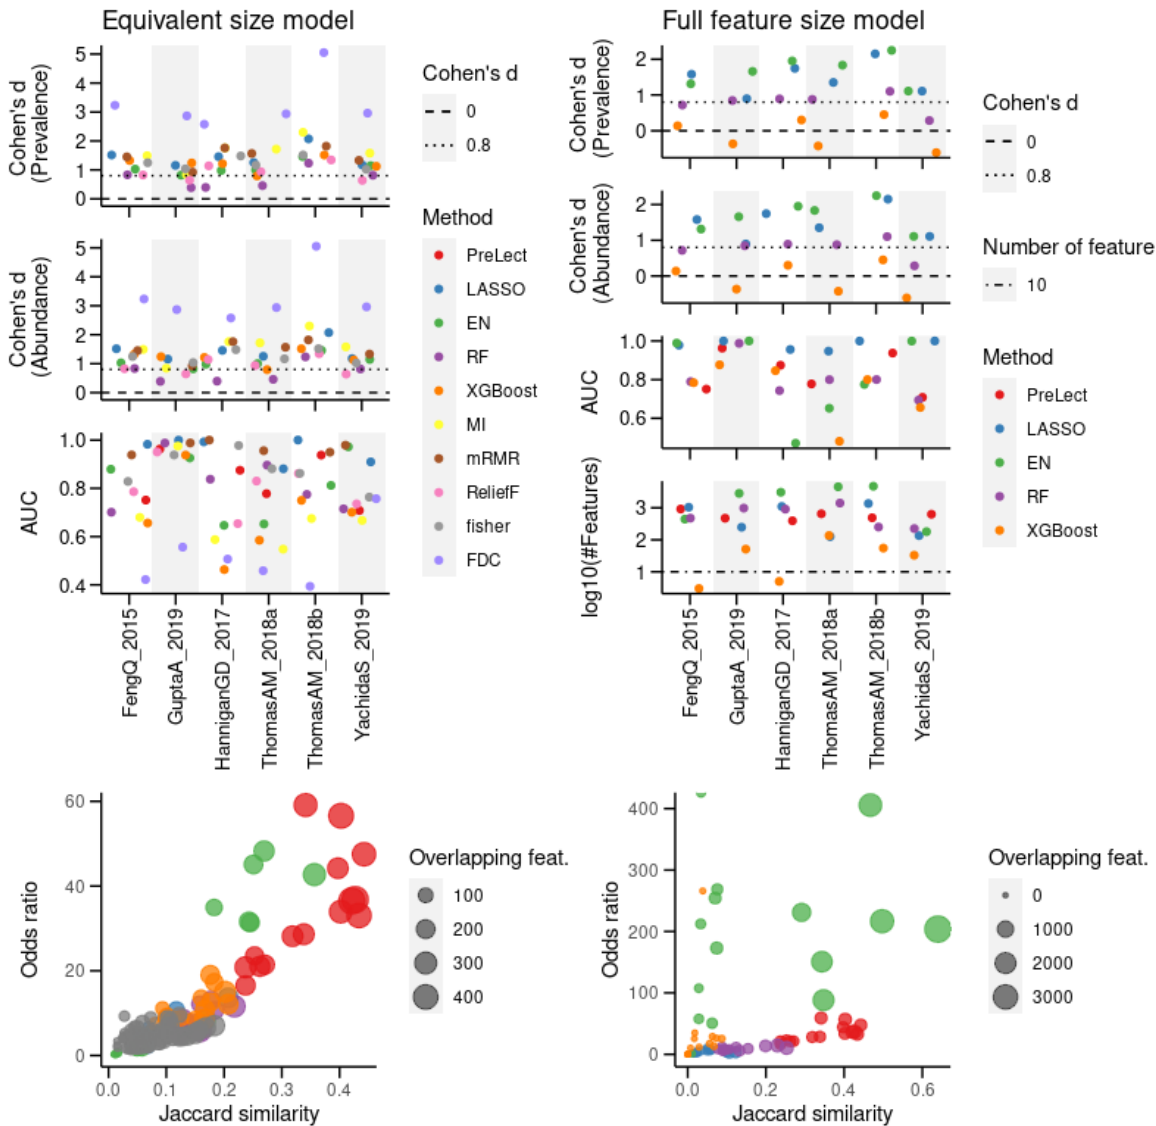

97

98 **Supplementary Figure 9. Comparison of PreLect with other ML-based methods in shotgun**  
 99 **dataset.**

100 The left panel illustrates the selection profile using the Equivalent Size Model, where the number of  
 101 features is constrained to match those selected by PreLect for nine benchmarking methods. The right  
 102 panel displays the results of the Full Feature Set Model, showcasing the benchmarked outcomes when  
 103 all available features are considered.

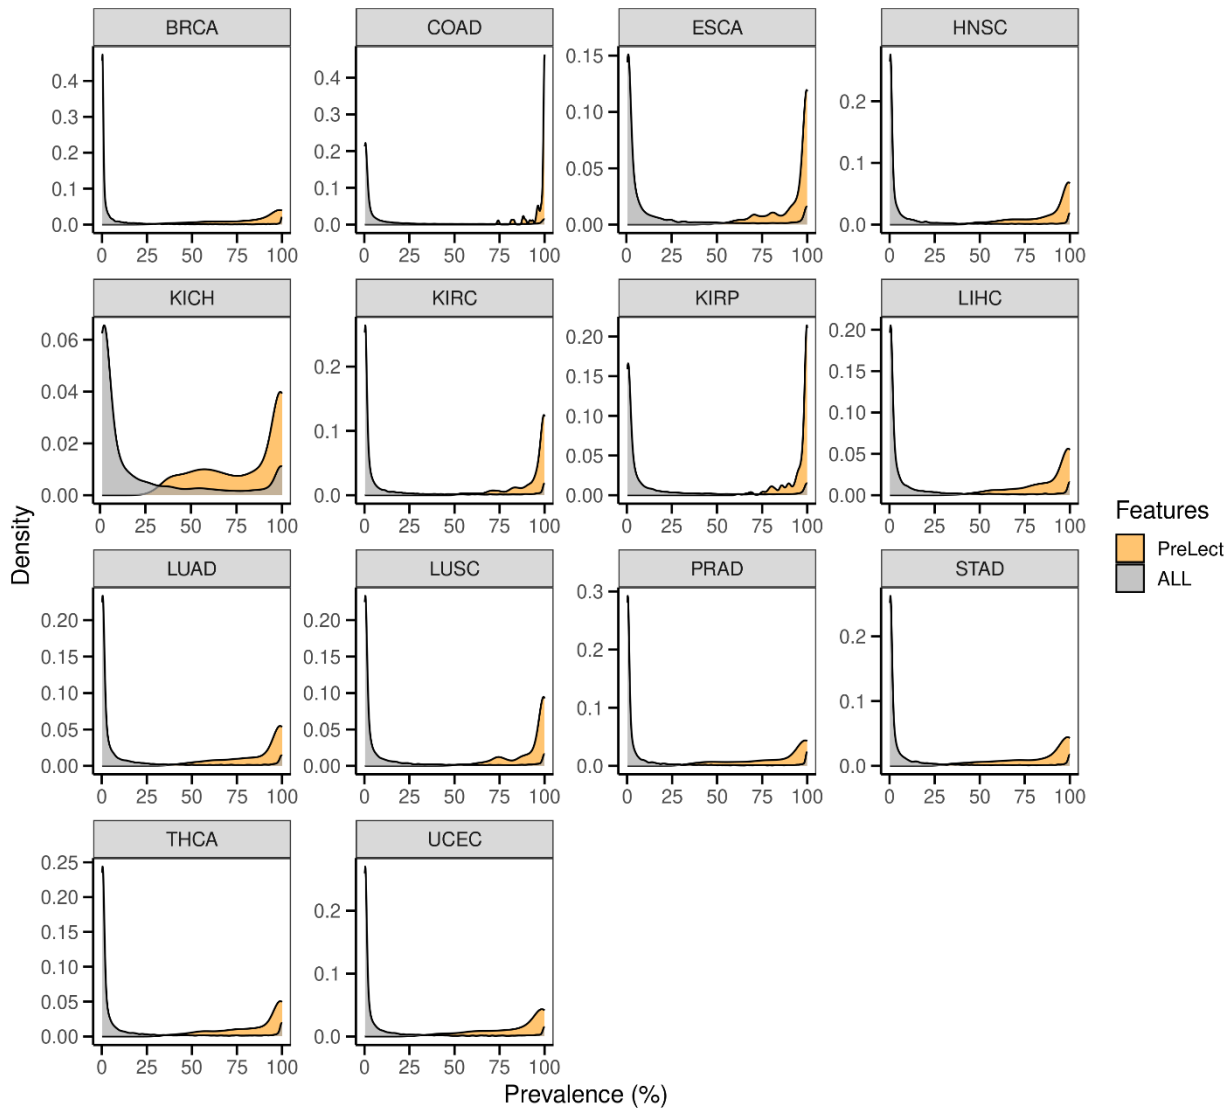

104

105 **Supplementary Figure 10. The sparsity of miRNA dataset.**

106 To demonstrate the sparsity in the miRNA dataset, we illustrated the whole feature prevalence by  
 107 density (grey) and the prevalence distribution of features selected by PreLect (orange).

108

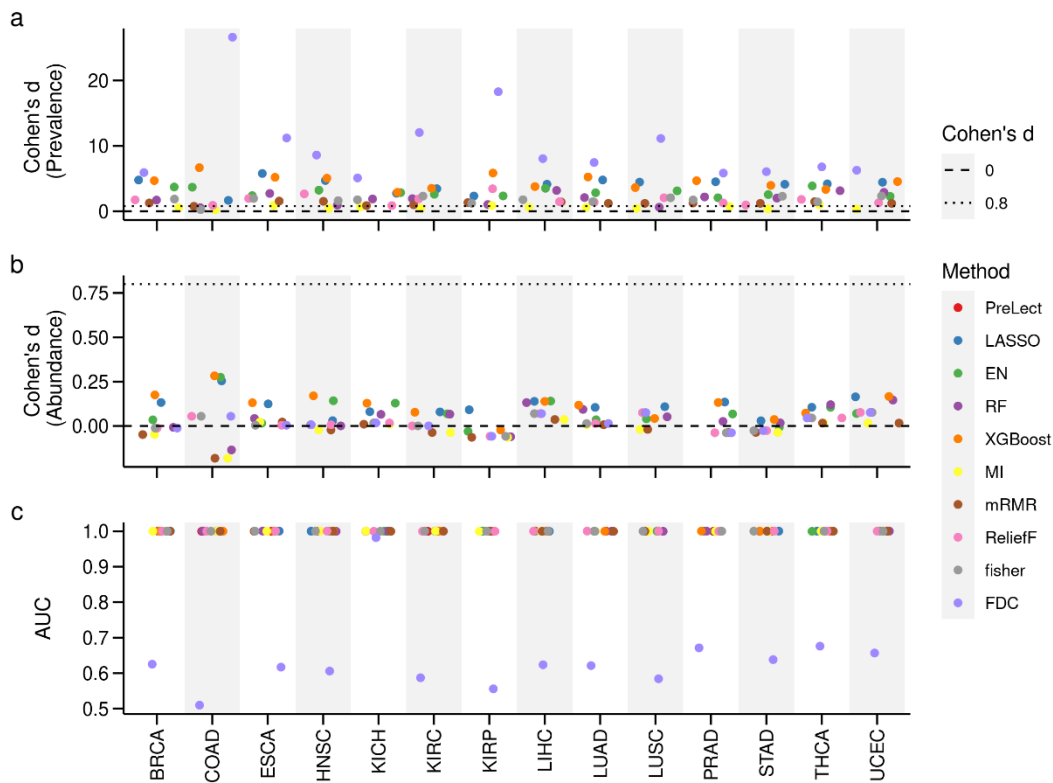

109

110 **Supplementary Figure 11. Comparison of PreLect with other ML-based methods in microRNA**  
 111 **dataset.**

112 (A) and (B) Effect size of prevalence and abundance difference. Cohen's D measures the effect size of  
 113 the prevalence difference between PreLect and other benchmarked methods. Values above 0.8 (dotted  
 114 line) indicate a notable higher feature prevalence or abundance of PreLect. (C) Classification  
 115 performance. The AUC value is derived from a naïve logistic regression model to classify case and  
 116 control samples. A full feature set was applied to evaluate the classification performance between  
 117 normal and tumor samples.

118

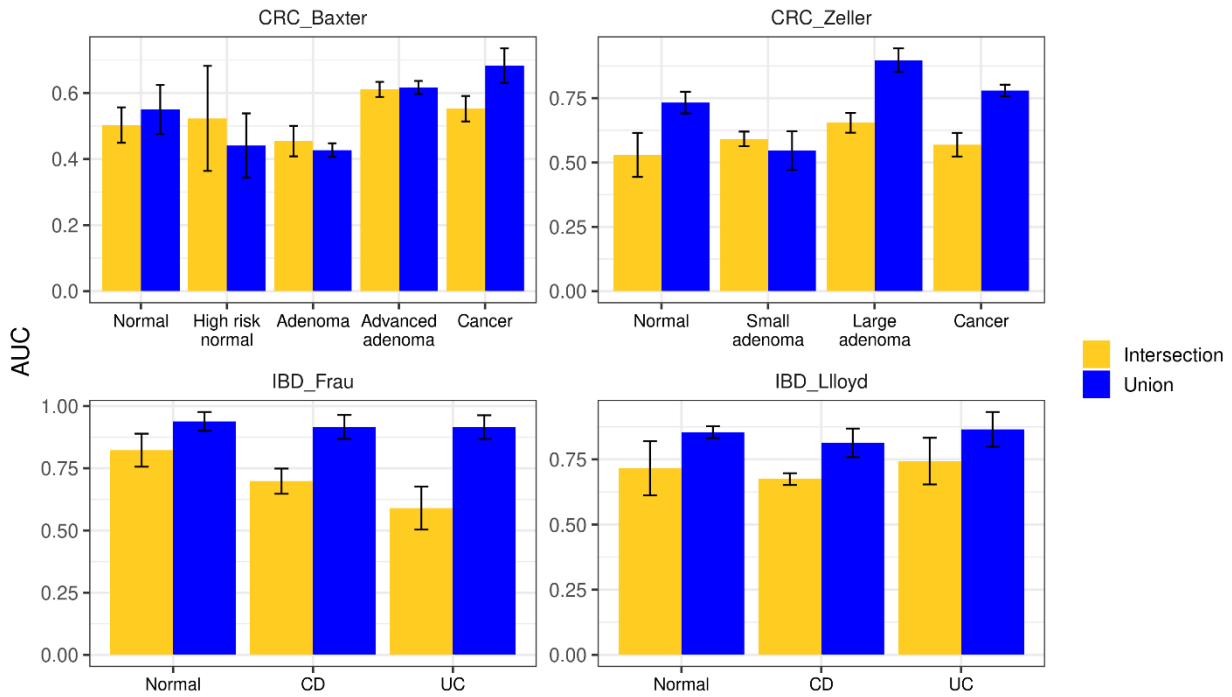

119

120 **Supplementary Figure 12. Exploring the potential of PreLect for multi-class classification.**

121 The feature set selected by PreLect was validated using logistic regression with one-vs.-rest strategy.

122 3-fold cross-validation was performed separately on each of the four datasets, and the mean and

123 standard deviation are indicated by barplot and error bars.

124

125

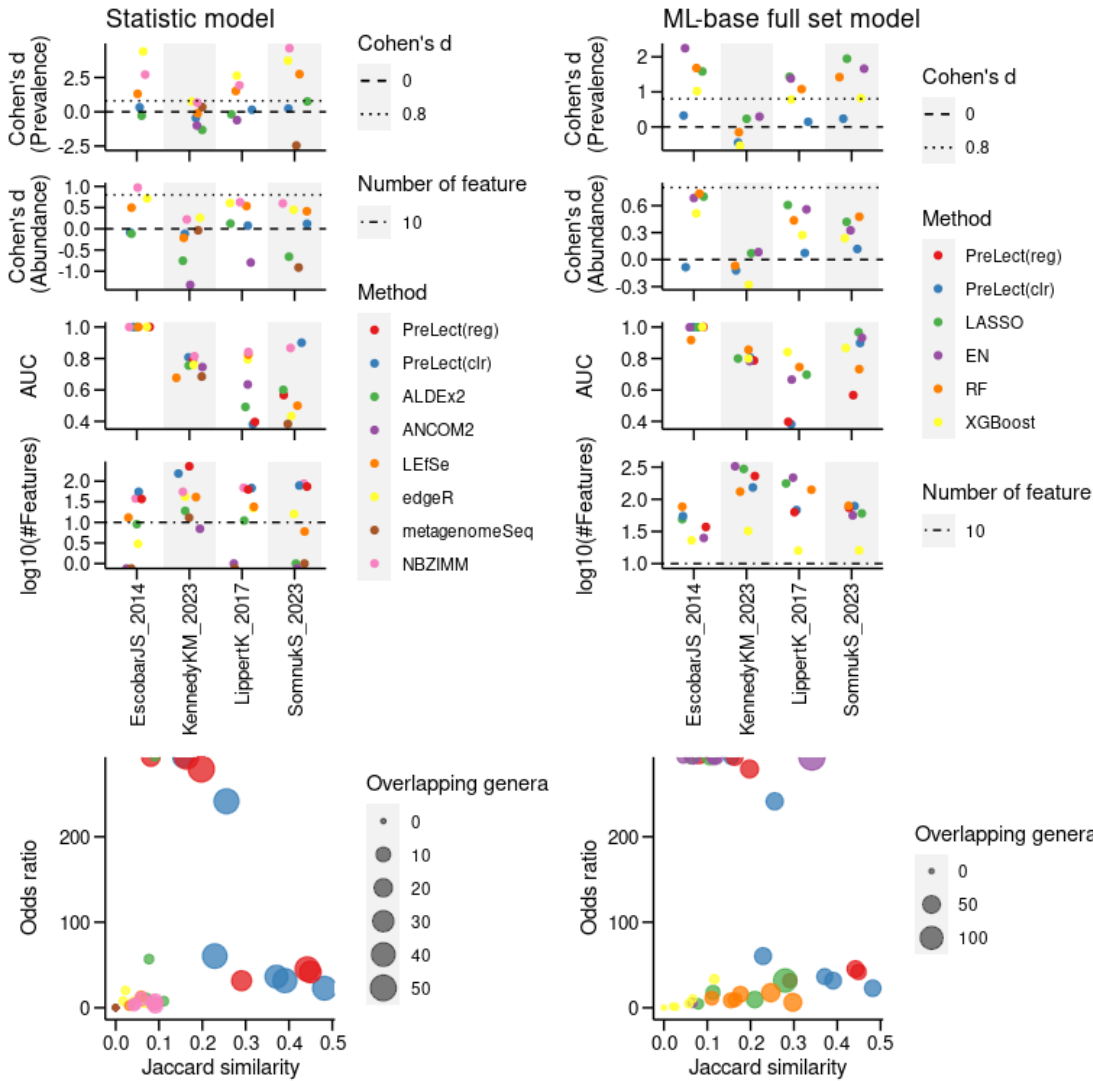

126

127 **Supplementary Figure 13. PreLect regression applied to obesity 16S amplicon data.**

128 This figure contrasts the feature sets obtained from PreLect regression (PreLect(reg)) with those from  
 129 PreLect classification (PreLect(clr)), as well as with other benchmarking methods. A Cohen's *d* value  
 130 exceeding 0.8, indicated by the dotted line, signifies significantly higher feature prevalence or  
 131 abundance in the PreLect regression compared to other methods.

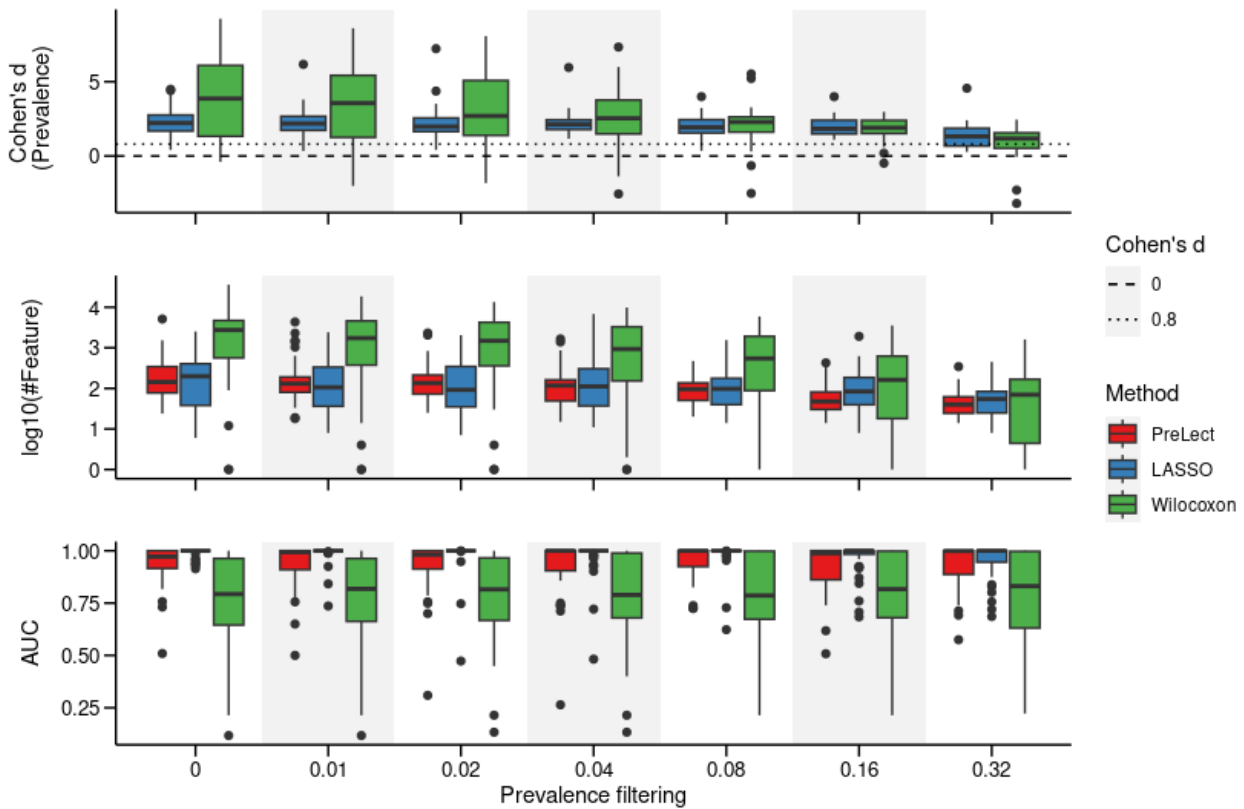

132

133 **Supplementary Figure 14. Comparative analysis of PreLect and conventional feature selection**  
 134 **methods using prevalence filtering strategy across 42 microbiome datasets.**

135 The upper panel presents the effect size of the prevalence difference. A positive Cohen's  $d$  value  
 136 indicates that features selected by PreLect exhibit higher prevalence compared to those selected by the  
 137 two conventional methods. The middle panel displays the number of features each method selected for  
 138 each dataset. The lower panel shows the classification performance, where the AUC score, derived  
 139 from a basic logistic regression model, evaluates the ability of the selected features to distinguish  
 140 between case and control samples.



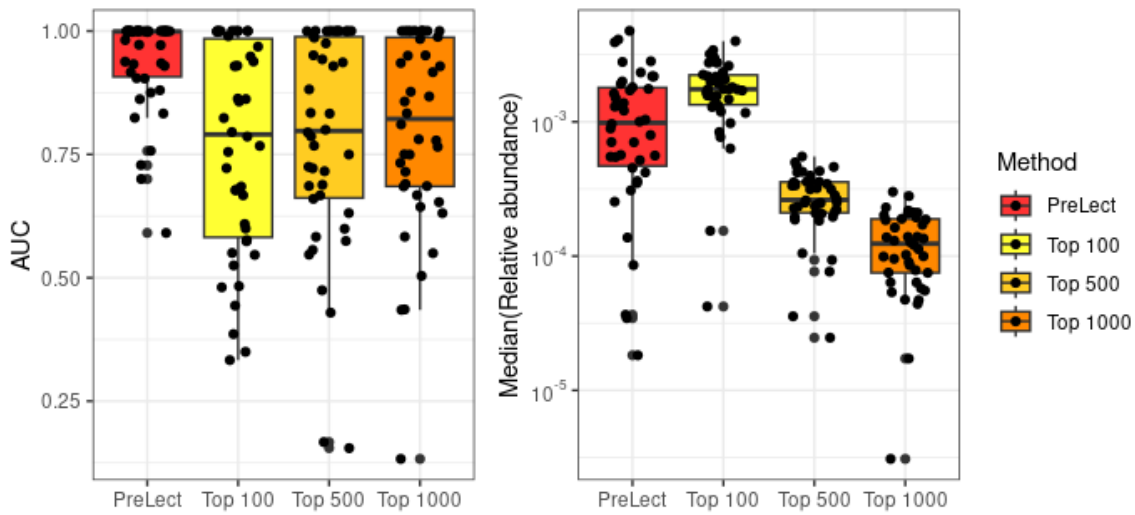

141

142 **Supplementary Figure 15. Classification capability of prevalent features.**

143 We selected the top 100, 500, and 1000 prevalent features from 42 benchmark datasets and assessed  
 144 their classification performance using logistic regression, while also analyzing their abundance. The  
 145 results suggest that PreLect effectively balances the selection of prevalent and informative features,  
 146 enhancing overall performance.

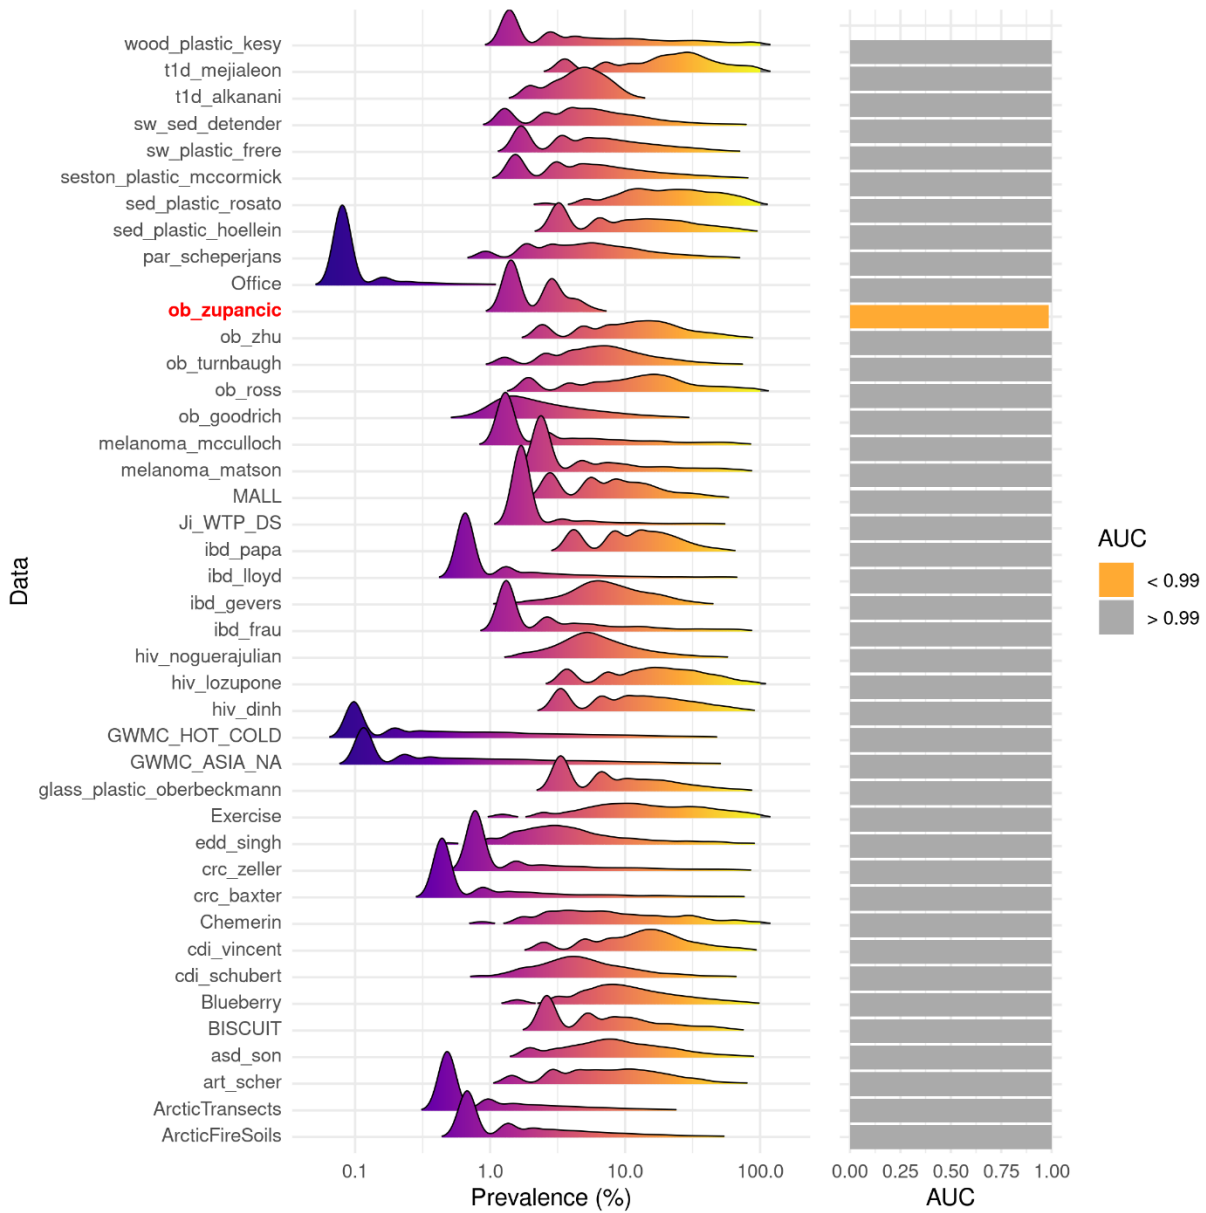

147

148 **Supplementary Figure 16. The prevalence distribution of the features could influence PreLect's**  
 149 **performance.**

150 The density plots on the left panel illustrate each dataset's feature prevalence distribution. The  
 151 performance of the feature set selected by PreLect is shown on the right panel, with the AUC as the  
 152 metric. Datasets with AUC scores lower than 0.99 are highlighted.

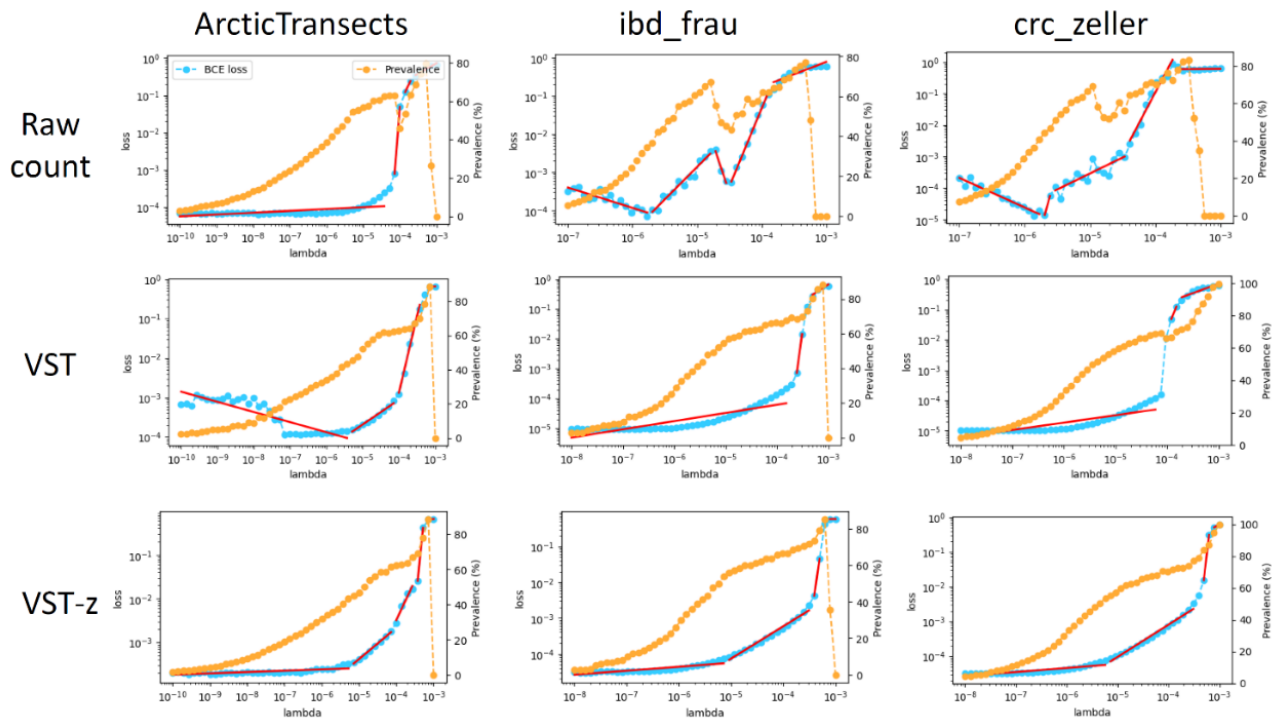

153

154 **Supplementary Figure 17. Stability of PreLect with VST-transformed data and z-Score**  
 155 **standardization.**

156 We conducted lambda scanning of PreLect using three different data processing methods: raw counts,  
 157 variance stabilizing transformation (VST)-transformed data, and VST-transformed data with z-score  
 158 standardization. Our analysis shows that using VST with z-score standardization results in the  
 159 smoothest loss curves, indicating enhanced stability in the model's performance.

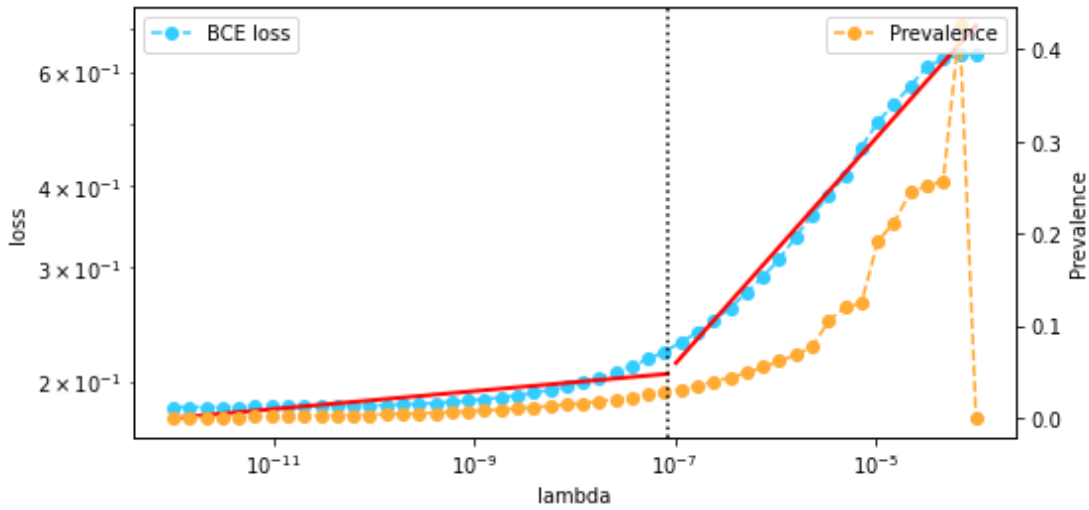

160  
 161 **Supplementary Figure 18. PreLect application in real-sim dataset.**

162 The lambda selection in real-sim of libsvm is shown, where segmented regression was conducted with  
 163  $k = 2$  in loss history. The blue points indicate the mean of loss, and the orange dots represent the mean  
 164 of prevalence for each lambda within five folds CV.

165

## 166 **Supplementary Notes**

### 167 **Supplementary Note 1: Multi-class classification**

168 In order to implement the multi-class task in PreLect with the one-vs-rest strategy, we design a  
169 perception  $w_{d \times l}$  where  $l \in [c] = 1, 2, \dots, c$  and  $c$  is the number of categories in labels, each  
170 column of perception  $w$  representing the different classifier, and the objective function is modified  
171 as the following equation.

$$\mathit{min} f(\mathbf{w}) = \frac{1}{c} \sum_l^c \left( \mathit{BCE}(\mathbf{y}_l, \hat{\mathbf{y}}_l) + \lambda \sum_j^d \frac{|\mathbf{w}_{j,l}|}{p_{j,l}} \right) \quad (1)$$

172 One hot encoding is implemented in the label, which is denoted as  $\mathbf{y}_{i \times l}$  and  $\mathbf{y}_{i \times l} \in [0, 1]$ , each  
173 column of  $\mathbf{y}$  is the response variable in each binary classifier. The  $p_{j,l}$  is the prevalence of feature  $i$   
174 that only considers samples belonging to category  $l$ , the loss is defined as the mean of BCE with  $L_1$ -  
175 regularization in each classifier, and the PGD is also utilized to optimize the perception. Like the single  
176 classification of PreLect, we examine the lambda with k-fold CV from  $10^{-8}$  to  $10^{-2}$  and select the  
177 suitable lambda at the turning point that loss value from the horizontal line to dramatic rising.

### 178 **Supplementary Note 2: PreLect regression**

179 We have developed a regression version of PreLect with the following objective function.

$$\mathit{min} f(\mathbf{w}) = \mathit{MSE}(\mathbf{y}, \hat{\mathbf{y}}) + \lambda \sum_j^d \frac{|\mathbf{w}_j|}{p_j} \quad (2)$$

180 Mean squared error (MSE) was used as the loss function, consistent with the classification version. We  
181 employed PGD to address the non-differentiability of the L1-norm, and optimized the parameters using  
182 RMSprop. The lambda tuning strategy remains consistent with the classification version, employing  
183 k-fold CV scanning. The optimal lambda is determined by segmented regression on the MSE loss  
184 curve.

### 185 **Supplementary Note 3: Benchmarked methods**

186 The benchmarked methods used in this study are listed below:

- 187 1. ALDEx2<sup>1</sup>: This method estimates abundance from count data using Monte Carlo sampling to  
188 generate a Dirichlet distribution with a uniform prior for each sample. It employs the centered log-  
189 ratio (CLR) transformation for scale invariance and sub-compositional coherence. Feature significance  
190 is evaluated using Wilcoxon tests, with Benjamini-Hochberg (BH) adjusted p-values. Significant  
191 features are selected based on a p-value threshold of 0.05.
- 192 2. ANCOM2<sup>2</sup>: This framework addresses sparsity in abundance analysis by ignoring zeros. Outlier  
193 zeros and structural zeros are identified, and a pseudo count is applied to the dataset for additive log  
194 ratios of features. The Wilcoxon rank-sum test examines significance, and p-values are adjusted using  
195 the BH method and using 0.05 as threshold.
- 196 3. edgeR<sup>3</sup>: This method applies pseudo count addition and relative log expression scaling to the raw  
197 count table. The exactTest function is used on negative binomial data for feature identification, with  
198 adjusted p-values corrected using the BH method. Features with corrected p-values lower than 0.05  
199 are selected.
- 200 4. LEfSe<sup>4</sup>: Raw count datasets are transformed into frequencies by dividing each feature count by  
201 the total library size. The effect size is calculated with linear discriminant analysis (LDA), and  
202 significance is estimated using the Wilcoxon rank-sum test. The default thresholds for feature selection  
203 are  $LDA > 2.0$  and  $p\text{-value} < 0.05$ .
- 204 5. metagenomeSeq<sup>5</sup>: The raw count table was normalized using cumulative-sum scaling (CSS), and  
205 a Zero-Inflated Log-Normal mixture model was fitted for each feature. The p-values were adjusted  
206 using the BH method. Significant features were selected based on a corrected p-value threshold of 0.05.
- 207 6. NBZIMM<sup>6</sup>: NBZIMM comprises two integral components. Firstly, a logistic model predicts  
208 excess zeros, while the second component employs a negative binomial distribution to model dispersed  
209 counts. In the study, the raw count table is utilized directly for significant estimation. All samples are  
210 treated as independent subjects, and features are selected based on BH corrected p-values below 0.05.
- 211 7. LASSO<sup>7</sup>: This is conventional L1-regularization, which is based on the absolute size of the  
212 regression coefficients for each feature. The regularization term is implemented with logistic

213 regression, and features with non-zero coefficients are selected after training.

214 8. Elastic Net (EN)<sup>8</sup>: This hybrid approach combines the penalizations of L1 and L2 regularization  
215 from LASSO and ridge methods. Users can assign a ratio for using L1 and L2 regularization. Like  
216 LASSO, features with non-zero weights are selected after training.

217 9. Random Forest (RF)<sup>9</sup>: This ensemble method combines numerous individual binary decision trees  
218 by bootstrapping the sample set. Features with zero weight, not included in the model, are dropped.

219 10. eXtreme Gradient Boosting (XGBoost)<sup>10</sup>: This well-known ensemble method iteratively  
220 combines several random forests into a single strong learner. XGBoost with L1 and L2 regularization  
221 is conducted using the xgboost package.

222 11. Mutual Information (MI)<sup>11</sup>: This metric is calculated as the difference between the joint  
223 probability distribution's entropy and the sum of the marginal distributions' entropies. It is used to  
224 evaluate the relationship strength between the feature and the target variable.

225 12. mRMR<sup>12</sup>: This method selects features based on maximum relevance to the outcome variable and  
226 minimum redundancy with previously selected features. It assigns a weight to each feature to evaluate  
227 its relationship with the target variable.

228 13. Relief-F<sup>13</sup>: This method iteratively samples instances from the dataset and assigns a weight to  
229 each feature based on how well it differentiates the sampled instance from other instances in the dataset.

230 14. Fisher Score<sup>14</sup>: This measure calculates the ratio of between-class variance to within-class  
231 variance, providing a measure of each feature's discriminatory power to a particular outcome variable.

232 15. Feature Dispersion Criterion (FDC)<sup>15</sup>: This unsupervised method estimates each feature's  
233 importance by measuring its dispersion. It computes the relevance criterion for a feature by dividing  
234 the arithmetic mean (AM) by the geometric mean (GM).

### 235 Computational Issues Encountered

236 During the analysis, we encountered several computational issues. ALDEx2 encountered memory  
237 exhaustion on six larger datasets (GWMC\_ASIA\_NA, GWMC\_HOT\_COLD, hiv\_dinh, ob\_zupancic,  
238 Office, and t1d\_alkanani), despite utilizing a machine with 256GB of RAM. ANCOM2 took an

239 excessively long time to run on three datasets (melanoma\_matson, ob\_zupancic, and sw\_plastic\_frere),  
240 exceeding five days, which led us to terminate the computations. LEfS failed to run on four larger  
241 datasets (ArcticTransects, GWMC\_ASIA\_NA, GWMC\_HOT\_COLD, and ob\_zupancic). While  
242 edgeR, metagenomeSeq, and NBZIMM successfully processed 42 datasets, but metagenomeSeq failed  
243 to identify significant features in nine datasets (art\_scher, asd\_son, BISCUIT, cdi\_vincent,  
244 melanoma\_matson, melanoma\_mcculloch, ob\_zupancic, par\_scheperjans, and t1d\_alkanani). All  
245 methods successfully processed all datasets. However, Elastic Net (EN) did not select any features in  
246 the hiv\_lozupone dataset.

247

## 248 **References**

- 249 1 Fernandes, A. D. *et al.* Unifying the analysis of high-throughput sequencing datasets:  
250 characterizing RNA-seq, 16S rRNA gene sequencing and selective growth experiments by  
251 compositional data analysis. *Microbiome* **2**, 1-13 (2014).
- 252 2 Kaul, A., Mandal, S., Davidov, O. & Peddada, S. D. Analysis of microbiome data in the  
253 presence of excess zeros. *Frontiers in microbiology* **8**, 2114 (2017).
- 254 3 Robinson, M. D. & Oshlack, A. A scaling normalization method for differential expression  
255 analysis of RNA-seq data. *Genome biology* **11**, 1-9 (2010).
- 256 4 Segata, N. *et al.* Metagenomic biomarker discovery and explanation. *Genome biology* **12**, 1-18  
257 (2011).
- 258 5 Paulson, J. N., Stine, O. C., Bravo, H. C. & Pop, M. Differential abundance analysis for  
259 microbial marker-gene surveys. *Nature methods* **10**, 1200-1202 (2013).
- 260 6 Zhang, X. & Yi, N. NBZIMM: negative binomial and zero-inflated mixed models, with  
261 application to microbiome/metagenomics data analysis. *BMC bioinformatics* **21**, 1-19 (2020).
- 262 7 Tibshirani, R. Regression shrinkage and selection via the lasso. *Journal of the Royal Statistical*  
263 *Society: Series B (Methodological)* **58**, 267-288 (1996).
- 264 8 Zou, H. & Hastie, T. Regularization and variable selection via the elastic net. *Journal of the*  
265 *royal statistical society: series B (statistical methodology)* **67**, 301-320 (2005).
- 266 9 Breiman, L. Random forests. *Machine learning* **45**, 5-32 (2001).
- 267 10 Chen, T. & Guestrin, C. in *Proceedings of the 22nd acm sigkdd international conference on*  
268 *knowledge discovery and data mining.* 785-794.
- 269 11 Kraskov, A., Stögbauer, H. & Grassberger, P. Estimating mutual information. *Physical review*  
270 *E* **69**, 066138 (2004).
- 271 12 Peng, H., Long, F. & Ding, C. Feature selection based on mutual information criteria of max-



- 272 dependency, max-relevance, and min-redundancy. *IEEE Transactions on pattern analysis and*  
273 *machine intelligence* **27**, 1226-1238 (2005).
- 274 13 Kononenko, I., Šimec, E. & Robnik-Šikonja, M. Overcoming the myopia of inductive learning  
275 algorithms with RELIEFF. *Applied Intelligence* **7**, 39-55 (1997).
- 276 14 Gu, Q., Li, Z. & Han, J. Generalized fisher score for feature selection. *arXiv preprint*  
277 *arXiv:1202.3725* (2012).
- 278 15 Artur Ferreira, M. a. F. in *proceedings, European Symposium on Artificial Neural Networks*  
279 (Bruges, 2011).
- 280
